# Supplementary material for: Stationary phases composed of sol–gel processed organometallic complexes functionalized with polyethylene glycol
Source: Royal Society of Chemistry journal article supplement (doi:10.1039/b304205g), 2003-01-01
Supplement: b304205g.doc [file b304205g.doc]

**Supplementary** **data**

**Stationary phases composed of sol-gel processed organometallic complexes functionalized with polyethylene glycol**

Joachim Büchele, Michael Marzini and Hermann A. Mayer*

*Institut für Anorganische Chemie der Universität Tübingen, Auf der Morgenstelle 18, 72076 Tübingen, Germany. E-mail: hermann.mayer@uni-tuebingen.de*

| **Table 1S** 29Si NMR data of the copolymers **7(P)a-c** | | | | |
| --- | --- | --- | --- | --- |
| Compound | Ideal stoichiometry  T : Q | Real stoichiometry  T : Q a) | Degree of condensation  T [%] / Q [%]a) | T1H [ms]b) |
| **7(0)a** | 1 : 0 | 1 : 0.0 | 49.3 / - | 5.53 |
| **7(0)b** | 1 : 1 | 1 : 1.0 | 42.3 / 94.8 | 5.27 |
| **7(0)c** | 1 : 4 | 1 : 3.9 | 43.5 / 88.6 | 4.86 |
| **7(9)a** | 1 : 0 | 1 : 0.0 | 73.0 / - | 2.58 |
| **7(9)b** | 1 : 1 | 1 : 1.1 | 71.4 / 83.7 | 2.25 |
| **7(9)c** | 1 : 4 | 1 : 4.6 | 67.4 / 85.9 | 2.18 |
| **7(48)a** | 1 : 0 | 1 : 0.0 | 89.7 / - | 0.76 |
| **7(48)b** | 1 : 1 | 1 : 1.0 | 81.9 / 88.0 | 0.83 |
| **7(48)c** | 1 : 4 | 1 : 2.4 | 82.9 / 85.3 | 1.57 |
| **7(120)a** | 1 : 0 | 1 : 0.0 | 89.9 / - | 2.49 |
| **7(120)b** | 1 : 1 | 1 : 1.1 | 87.3 / 88.5 | 2.04 |
| **7(120)c** | 1 : 4 | 1 : 3.7 | 87.4 / 90.1 | 1.78 |
| **7(230)a** | 1 : 0 | 1 : 0.0 | 100.0 / - | 1.63 |
| **7(230)b** | 1 : 1 | 1 : 1.1 | 97.7 / 89.6 | 1.49 |
| **7(230)c** | 1 : 4 | 1 : 3.4 | 100.0 / - | 1.46 |
| **7(270)a** | 1 : 0 | 1 : 0.0 | 100.0 / - | 1.61 |
| **7(270)b** | 1 : 1 | 1 : 1.0 | 100.0 / 89.8 | 1.60 |
| **7(270)c** | 1 : 4 | 1 : 4.6 | 97.4 / 91.0 | 1.51 |
| a)Detected via variation of the contact time or via single puls excitation (SPE). b)Obtained by 29Si according to ref.32 | | | | |

| **Table 2S** 31P CP/MAS, TPH, T1H, and T1P data of the hybrid polymers **7(P)a-c** | | | | | |
| --- | --- | --- | --- | --- | --- |
| Compound |  [ppm] | TPH [ms]a) | T1H [ms]b) | 1/2 [Hz] | T1P [s]c) |
| **7(0)a** | 44.4 | 0.543 | 5.80 | 444 | 54.8 |
| **7(0)b** | 44.5 | 0.455 | 6.91 | 495 | 43.6 |
| **7(0)c** | 44.4 | 0.632 | 6.50 | 473 | 39.2 |
| **7(9)a** | 43.8 | 0.949 | 5.10 | 430 | 52.9 |
| **7(9)b** | 43.6 | 0.438 | 6.89 | 486 | 41.1 |
| **7(9)c** | 43.6 | 0.693 | 6.62 | 478 | 38.2 |
| **7(48)a** | 44.8 | 1.9 | 1.6 | 369 | 26.7 |
| **7(48)b** | 44.6 | 2.9 | 2.4 | 297 | 33.9 |
| **7(48)c** | 44.5 | 4.6 | 3.6 | 307 | 36.3 |
| **7(120)a** | 43.9 | 0.483 | 1.21 | 313 | 19.9 |
| **7(120)b** | 44.1 | 0.486 | 1.43 | 320 | 24.0 |
| **7(120)c** | 44.0 | 0.554 | 1.51 | 351 | 27.2 |
| **7(230)a** | 43.7 | 0.368 | 1.27 | 308 | 29.5 |
| **7(230)b** | 43.6 | 0.531 | 1.87 | 320 | 28.9 |
| **7(230)c** | 43.8 | 0.498 | 1.99 | 358 | 25.3 |
| **7(270)a** | 43.8 | 0.759 | 1.40 | 332 | 29.4 |
| **7(270)b** | 43.5 | 0.642 | 1.88 | 334 | 33.6 |
| **7(270)c** | 43.6 | 0.743 | 1.71 | 327 | 27.3 |
| a) Detected via variation of the contact time. b) Determined via 31P.32 c) T1 NMR experiment according at 295 K.42 | | | | | |
|  |  |  |  |  |  |

| **Table 3S** Synthesis of the Copolymers **6(P)a-d** | | | | | | |  | |
| --- | --- | --- | --- | --- | --- | --- | --- | --- |
| Compound | **4(p)**a)  [mg] / [mmol] | Si(OEt)4  [µL] / [mmol] | H2O  [µL] / [mmol] | EtOH  [mL] | Consistency | Yieldb)  [mg] / [%] | | M  (Copolymer)c)  [g/mol] |
| **6(3)a** | 182 / 0.110 | 147 / 0.660 | 196 / 10.900 | 0.5 | Powder | 114 / 61.8 | | 1780 |
| **6(6)b** | 314 / 0.176 | - | 86 / 4.750 | 1.5 | Powder | 200 / 78.3 | | 1450 |
| **6(90)a** | 520 / 0.095 | 127 / 0.569 | 169 / 9.386 | 1.0 | Rubber | 321 / 61.3 | | 5450 |
| **6(120)c** | 681 / 0.100 | 67 / 0.300 | 113 / 6.305 | 2.0 | Waxy | 449 / 67.4 | | 6640 |
| **6(120)d** | 681 / 0.100 | 335 / 1.500 | 373 / 20.715 | - | Powder | 408 / 55.3 | | 7160 |
| **6(150)a** | 406 / 0.050 | 67 / 0.300 | 89 / 4.947 | 0.5 | Waxy | 307 / 75.3 | | 7910 |
| **6(150)d** | 406 / 0.050 | 167 / 0.750 | 186 / 10.344 | - | Powder | 225 / 51.8 | | 8520 |
| a) For n = 0. b) Calculated for an ideal sol-gel process. c) Molecular weight under consideration of the degree of condensations and the real stoichiometry (complete hydrolysis). | | | | | | | | |

| **Table 4S** Synthesis of the copolymers **7(P)a-c** | | | | |  |
| --- | --- | --- | --- | --- | --- |
| Compound | **3(P)**  [mg] / [mmol] | 3-(Triethoxysilyl)-propylisocyanate [µL] / [mmol] | Si(OMe)4  [µL] / [mmol] | H2O [µL] / [mmol] | Yield  [mg] / [%] |
| **7(0)a** | 532 / 0.587 | 436 / 1.762 | - | 190 / 10.570 | 738 / 101.2 |
| **7(0)b** | 532 / 0.587 | 436 / 1.762 | 261 / 1.762 | 444 / 24.662 | 812 / 97.3 |
| **7(0)c** | 532 / 0.587 | 436 / 1.762 | 1044 / 7.046 | 1206 / 66.940 | 1145 / 99.4 |
| **7(9)a** | 64 / 0.049 | 37 / 0.147 | - | 16 / 0.885 | 78 / 96.5 |
| **7(9)b** | 64 / 0.049 | 37 / 0.147 | 22 / 0.147 | 37 / 2.065 | 88 / 98.3 |
| **7(9)c** | 64 / 0.049 | 37 / 0.147 | 87 / 0.590 | 101 / 5.604 | 106 / 91.2 |
| **7(48)a** | 1378 / 0.456 | 356 / 1.441 | - | 156 / 8.66 | 1570 / 106.7 |
| **7(48)b** | 1378 / 0.456 | 356 / 1.441 | 214 / 1.451 | 364 / 20.20 | 1458 / 99.1 |
| **7(48)c** | 1378 / 0.456 | 356 / 1.441 | 855 / 5.797 | 988 / 54.83 | 1432 / 97.3 |
| **7(120)a** | 230 / 0.037 | 28 / 0.111 | - | 12 / 0.669 | 243 / 100.3 |
| **7(120)b** | 230 / 0.037 | 28 / 0.111 | 17 / 0.111 | 28 / 1.561 | 243 / 97.4 |
| **7(120)c** | 230 / 0.037 | 28 / 0.111 | 66 / 0.444 | 76 / 4.236 | 259 / 96.3 |
| **7(230)a** | 1234 / 0.112 | 83 / 0.336 | - | 36 / 2.014 | 1204 / 94.7 |
| **7(230)b** | 1234 / 0.112 | 83 / 0.336 | 50 / 0.336 | 85 / 4.699 | 1270 / 98.3 |
| **7(230)c** | 1234 / 0.112 | 83 / 0.336 | 199 / 1.343 | 230 / 12.754 | 1249 / 92.4 |
| **7(270)a** | 964 / 0.075 | 56 / 0.226 | - | 24 / 1.357 | 988 / 99.9 |
| **7(270)b** | 964 / 0.075 | 56 / 0.226 | 34 / 0.226 | 57 / 3.166 | 961 / 95.8 |
| **7(270)c** | 964 / 0.075 | 56 / 0.226 | 134 / 0.904 | 155 / 8.592 | 976 / 93.5 |

| **Table 5S** 29Si chemical shifts and relative intensities of the silyl species of the copolymers **7(P)a-c** | | | | | | | | | | | | |  | | | |
| --- | --- | --- | --- | --- | --- | --- | --- | --- | --- | --- | --- | --- | --- | --- | --- | --- |
| Compound | Chemical shift (29Si) [ppm] | | | | | | | 29Si Substructure, relative intensity I0a) | | | | | | | | |
|  | T0 | T1 | T2 | T3 | Q2 | Q3 | Q4 | T0 | T1 | T2 | T3 | Q2 | | Q3 | Q4 | |
| **7(0)a** | -44.1 | -52.0 | -59.5 | -67.3 | - | - | - | 17.0 | 32.9 | 35.4 | 14.7 | - | | - | - | |
| **7(0)b** | -44.1 | -51.8 | -59.5 | -67.9 | -93.1 | -100.8 | -109.4 | 9.0 | 18.9 | 20.4 | 0.9 | 2.6 | | 5.4 | 42.8 | |
| **7(0)c** | -43.9 | -51.6 | -58.9 | -66.9 | -90.9 | -99.9 | -109.9 | 3.6 | 7.9 | 8.0 | 1.0 | 7.6 | | 21.1 | 50.8 | |
| **7(9)a** | -45.4 | -50.7 | -58.3 | -66.0 | - | - | - | 4.7 | 18.9 | 28.4 | 48.0 | - | | - | - | |
| **7(9)b** | -44.8 | -52.7 | -58.8 | -66.2 | -90.9 | -100.2 | -109.3 | 2.2 | 9.7 | 15.1 | 20.7 | 6.5 | | 21.2 | 24.6 | |
| **7(9)c** | -43.6 | -52.5 | -59.8 | -67.3 | -90.5 | -99.3 | -107.9 | 0.9 | 4.5 | 5.8 | 6.7 | 8.5 | | 29.3 | 44.3 | |
| **7(48)a** | - | -52.0 | -58.1 | -65.9 | - | - | - | - | 3.83 | 23.2 | 72.9 | **-** | | - | - | |
| **7(48)b** | - | -51.7 | -58.5 | -65.4 | -94.4 | -101.3 | -109.4 | - | 2.96 | 22.0 | 26.3 | 2.9 | | 17.5 | 28.4 | |
| **7(48)c** | - | -54.0 | -57.8 | -65.0 | -93.1 | -101.0 | -109.2 | - | 3.1 | 8.9 | 17.4 | 4.1 | | 33.2 | 33.3 | |
| **7(120)a** | - | -52.4 | -59.3 | -66.7 | - | - | - | - | 2.1 | 26.6 | 71.3 | **-** | | - | - | |
| **7(120)b** | - | -51.8 | -58.5 | -66.3 | -90.1 | -100.3 | -109.3 | - | 1.2 | 15.7 | 30.7 | 1.3 | | 21.5 | 29.6 | |
| **7(120)c** | - | -52.5 | -58.5 | -67.2 | -89.6 | -100.1 | -108.7 | - | 0.5 | 7.0 | 13.8 | 1.7 | | 27.8 | 49.2 | |
| **7(230)a** | - | - | - | -67.0 | - | - | - | - | - | - | 100.0 | - | | - | - | |
| **7(230)b** | - | - | -59.1 | -66.4 | -89.6 | -99.9 | -109.3 | - | - | 3.3 | 44.3 | 1.2 | | 19.3 | 31.9 | |
| **7(230)c** |  |  | -59.0 | -66.3 | -90.4 | -100.0 | -107.9 | - | - | 1.8 | 21.0 | 0.5 | | 20.3 | 56.4 | |
| **7(270)a** | - | - | - | -67.3 | - | - | - | - | - | - | 100.0 | - | | - | - | |
| **7(270)b** | - | - | - | -66.9 | -89.9 | -100.3 | -109.5 | - | - | - | 47.6 | 1.1 | | 19.1 | 32.2 | |
| **7(270)c** | - | - | -58.0 | -65.8 | -90.2 | -100.2 | -109.4 | - | - | 1.4 | 16.5 | 1.2 | | 27.2 | 53.7 | |
| a) Determined either by variation of the contact time or by SPE experiments | | | | | | | | | | | | | | | |  |
